# Supplementary material for: Pseudomonas aeruginosa Contact-Dependent Growth Inhibition Plays Dual Role in Host-Pathogen Interactions
Source: PubMed Central journal article supplement (PMC5687917; doi:10.1128/msphere.00336-17), 2017-11-15

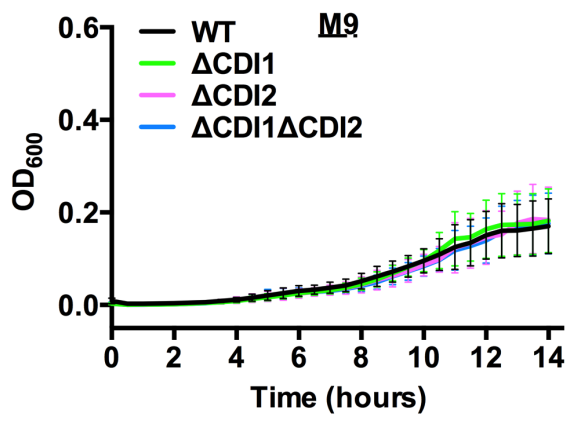

Supplement: sph006172403sf1.pdf [file sph006172403sf1.pdf]
